# Supplementary material for: Analysis of variability in divergence and turn-over induced by threeidealized convective systems with a 3D cloud resolving model
Source: Copernicus journal article supplement (doi:10.5194/acp-2020-1142), 2020-11-23
Supplement: Supplementary file 1 [file acp-2020-1142-supplement.pdf]

# **Supplementary material - Analysis of variability in divergence and turn-over induced by three idealized convective systems with a 3D cloud resolving model**

Edward Groot<sup>1</sup> and Holger Tost<sup>1</sup>

<sup>1</sup>Institut für Physik der Atmosphäre, Johannes Gutenberg Universität, Johannes-Joachim-Becher-Weg 21, Mainz, Germany

**Correspondence:** Edward Groot (egroot@uni-mainz.de)

## **S1 Experiment overview**

Table S1 gives an overview with definitions of all experiments performed in this study.

**Table S1.** List of experiments with their respective settings. Each experiment was done with each of the cases.

| Name                  | Experiment collection               | Definition                                                                                                        |
|-----------------------|-------------------------------------|-------------------------------------------------------------------------------------------------------------------|
| Control_reference     | All experiment collections          | $z_{top} = 6000.0$ m (case 1)                                                                                     |
|                       |                                     | $z_{top} = 2500.0$ m (case 2 & 3)                                                                                 |
|                       |                                     | 200x200x100 m grid                                                                                                |
|                       |                                     | $L_v = L_{v,ref}$<br>$adv(z) = w \frac{\partial v_{hor}}{\partial z}, adv(z) = w \frac{\partial q_v}{\partial z}$ |
| ENS_01                | Ensemble member                     | $z_{top} = 6095.9565472$ m<br>$z_{top} = 2539.98189467$ m                                                         |
| ENS_02                | Ensemble member                     | 5758.42068902 m // 2399.34195376 m                                                                                |
| ENS_03                | Ensemble member                     | 5887.00610239 m // 2452.91920933 m                                                                                |
| ENS_04                | Ensemble member                     | 6052.55517416 m // 2521.89798923 m                                                                                |
| ENS_05                | Ensemble member                     | 5695.83407152 m // 2373.26419647 m                                                                                |
| ENS_06                | Ensemble member                     | 5744.91637676 m // 2393.71515698 m                                                                                |
| ENS_07                | Ensemble member                     | 5737.47939255 m // 2390.61641356 m                                                                                |
| ENS_08                | Ensemble member                     | 5968.36439833 m // 2486.8184993 m                                                                                 |
| ENS_09                | Ensemble member                     | 6095.57941954 m // 2539.82475814 m                                                                                |
| ref_res_500m          | Resolution (coarse grid)            | 500x500x250 m grid                                                                                                |
| ref_res_1km           | Resolution (coarse grid)            | 1000x1000x500 m grid                                                                                              |
| cubic_res_200m        | Resolution (fine cubic grid)        | 200x200x200 m grid                                                                                                |
| cubic_res_100m        | Resolution (fine cubic grid)        | 100x100x100 m grid                                                                                                |
| controlling_lve_0.6   | Latent heat                         | $L_v = 0.6L_{v,ref}$                                                                                              |
| controlling_lve_0.8   | Latent heat                         | $L_v = 0.8L_{v,ref}$                                                                                              |
| controlling_lve_0.9   | Latent heat                         | $L_v = 0.9L_{v,ref}$                                                                                              |
| controlling_lve_1.1   | Latent heat                         | $L_v = 1.1L_{v,ref}$                                                                                              |
| controlling_lve_1.2   | Latent heat                         | $L_v = 1.2L_{v,ref}$                                                                                              |
| controlling_vadv_0.0  | Vertical advection of hor. momentum | $adv(z) = 0 \frac{\partial v_{hor}}{\partial z}$                                                                  |
| controlling_vadv_0.5  | Vertical advection of hor. momentum | $adv(z) = 0.5w \frac{\partial v_{hor}}{\partial z}$                                                               |
| controlling_vadv_0.8  | Vertical advection of hor. momentum | $adv(z) = 0.8w \frac{\partial v_{hor}}{\partial z}$                                                               |
| controlling_vadv_1.5  | Vertical advection of hor. momentum | $adv(z) = 1.5w \frac{\partial v_{hor}}{\partial z}$                                                               |
| controlling_qvadv_0.8 | Vertical advection of water vapor   | $adv(z) = 0.8w \frac{\partial q_v}{\partial z}$                                                                   |
| controlling_qvadv_1.2 | Vertical advection of water vapor   | $adv(z) = 1.2w \frac{\partial q_v}{\partial z}$                                                                   |

## S2 Decorrelation of ensemble members

In Figure S2 the decorrelation between ensemble pairs is shown per case (analogously to and based on Hohenegger and Schär (2007)). The calculation of a zonal velocity deviation field is given in Equation S2. Subsequently, members have been paired to calculate the correlation coefficient between their zonal velocity deviation fields. Because for some simulations initial conditions or final conditions (after 0 and 120 minutes) were not stored properly in the netCDF files, some member pairs of the 10 member ensemble have been omitted. Additionally, if an odd number of members could be used due to such an error, one member has been used in two pairs.

$$10 \quad U_{deviation.x} = U_{reference} - U_{member.x} \quad (S2)$$

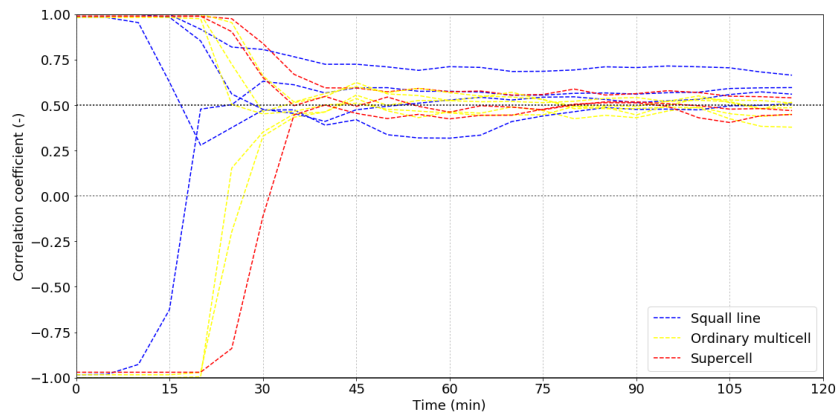

**Figure S2.** Correlations between zonal velocity deviation fields as function of time. Initially, the errors behave nearly linearly (0-10 minutes), starting from nearly  $\pm 1$ . Then there is a transition stage (10-35 minutes). After the transition stage, all pairs of zonal velocity deviation fields but two (both from the squall line case) seem to behave randomly. After 70 minutes only one has not yet approached the random realization asymptote.

## References

Hohenegger, C. and Schär, C.: Predictability and Error Growth Dynamics in Cloud-Resolving Models, *Journal of the atmospheric sciences*, 64, 4467–4478, 2007.
